# Supplementary material
Source: PubMed Central journal article supplement (PMC7666024)
Supplement: NIHMS1614574-supplement-supp_info.pdf [file NIHMS1614574-supplement-supp_info.pdf]

### Supplementary Figure S1. Participant Flow Diagram

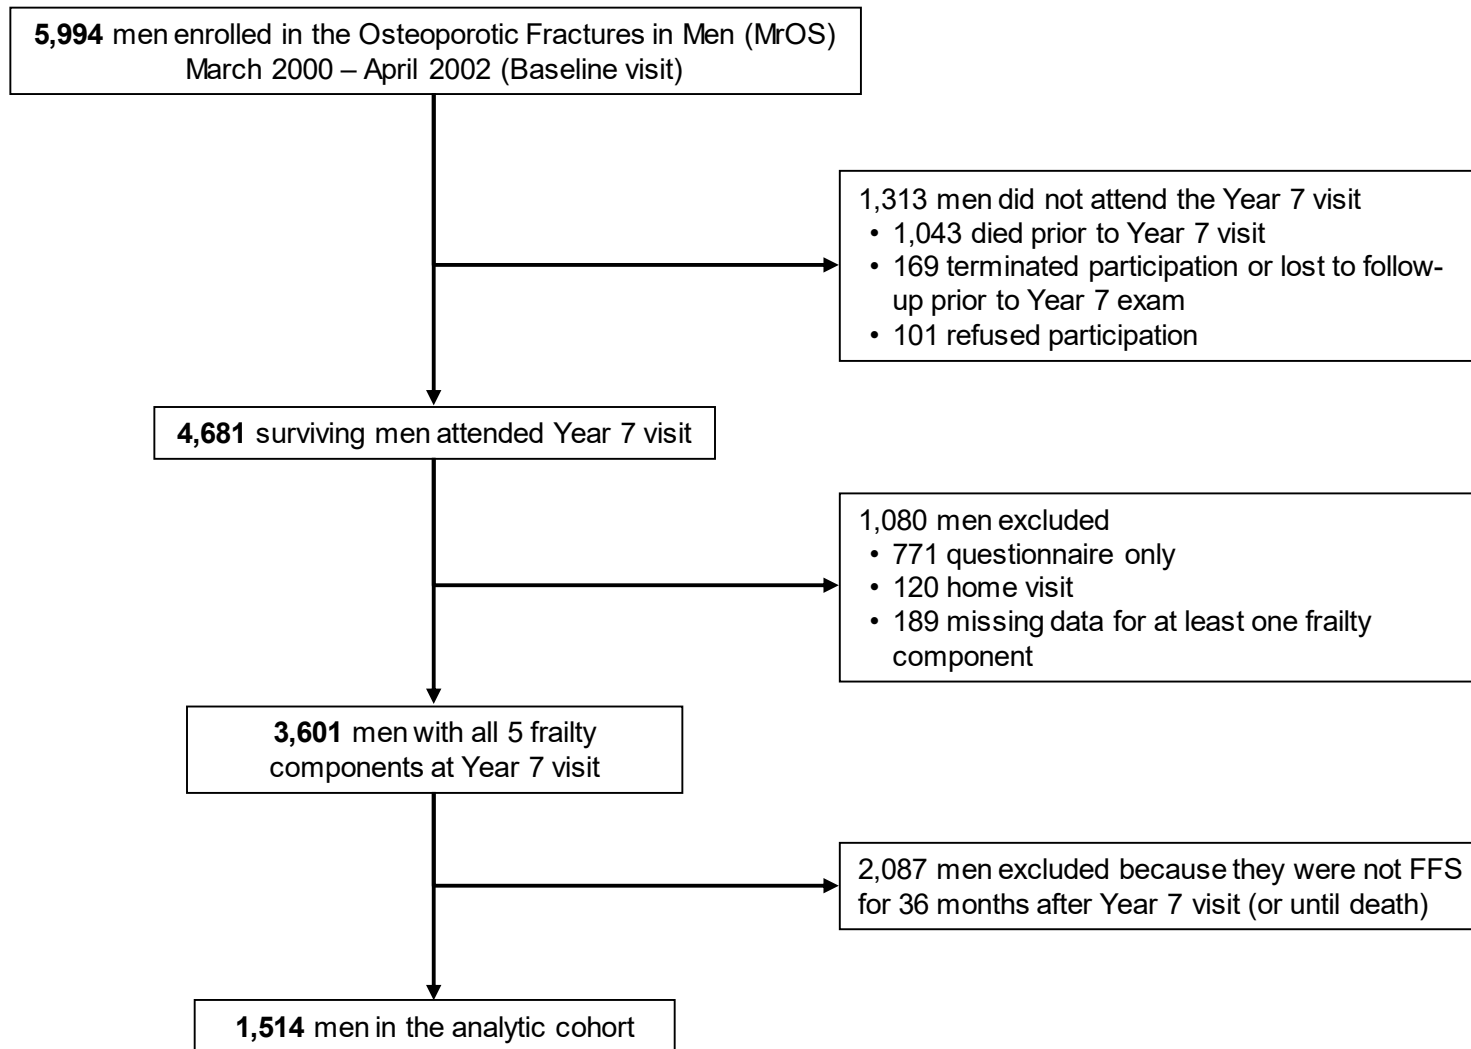

Abbreviations: FFS, Fee-For-Service

**Supplementary Table S1. Characteristics by Medicare Fee-For-Service Enrollment Status**

| Characteristic <sup>a</sup>   | FFS Enrollment  |                | P-value |
|-------------------------------|-----------------|----------------|---------|
|                               | Yes<br>(n=1514) | No<br>(n=2087) |         |
| Age, years, mean (SD)         | 79.3 (5.17)     | 79.1 (5.11)    | 0.22    |
| White race, n (%)             | 1394 (92.1)     | 1881 (90.1)    | 0.04    |
| Ever smoker, n (%)            | 899 (59.4)      | 1273 (61.0)    | 0.33    |
| Years of Education, n (%)     |                 |                | <0.001  |
| High school or less           | 255 (16.8)      | 485 (23.2)     |         |
| College/grad school           | 1259 (83.2)     | 1602 (76.8)    |         |
| GDS score (0-15), mean (SD)   | 1.8 (2.06)      | 1.9 (2.21)     | 0.48    |
| 3MS (0-100), mean (SD)        | 92.6 (6.53)     | 92.1 (6.82)    | 0.02    |
| # IADL impairments, mean (SD) | 0.4 (0.98)      | 0.4 (0.93)     | 0.68    |
| # IADL impairments, n (%)     |                 |                | 0.64    |
| 0                             | 1167 (77.1)     | 1587 (76.2)    |         |
| 1                             | 179 (11.8)      | 268 (12.9)     |         |
| ≥2                            | 168 (11.1)      | 227 (10.9)     |         |
| Body mass index, mean (SD)    | 27.0 (3.75)     | 27.1 (3.96)    | 0.65    |
| Frailty phenotype, n (%)      |                 |                | 0.32    |
| Robust                        | 429 (28.3)      | 562 (26.9)     |         |
| Pre-frail                     | 886 (58.5)      | 1217 (58.3)    |         |
| Frail                         | 199 (13.1)      | 308 (14.8)     |         |

Note: FFS, Fee-for-Service; GDS, Geriatric Depression Scale; 3MS, Modified Mini-Mental State Examination; IADL, Instrumental Activities of Daily Living

<sup>a</sup>Participant characteristics assessed at MrOS Year 7 examination

**Supplementary Table S2. Healthcare Costs Among Women With or Without Specific Frailty Components**

|                       | Yes                       | No                      |
|-----------------------|---------------------------|-------------------------|
| <b>Mean (SD)</b>      |                           |                         |
| Shrinking             | \$14,663 (28,169)         | \$8,454 (15,264)        |
| Weakness              | \$15,719 (26,018)         | \$8,133 (15,701)        |
| Poor Energy           | \$11,301 (18,348)         | \$7,760 (17,936)        |
| Slowness              | \$20,232 (25,246)         | \$8,341 (16,906)        |
| Low Physical Activity | \$11,748 (20,767)         | \$8,289 (16,582)        |
| <b>Median (IQR)</b>   |                           |                         |
| Shrinking             | \$6,031 (2,543 – 15,147)  | \$3,333 (1,600 – 8,496) |
| Weakness              | \$6,833 (2,590 – 16,635)  | \$3,275 (1,596 – 8,206) |
| Poor Energy           | \$4,950 (2,050 – 12,347)  | \$2,977 (1,442 – 7,149) |
| Slowness              | \$11,351 (3,690 – 27,336) | \$3,349 (1,622 – 8,284) |
| Low Physical Activity | \$4,564 (1,714 – 12,131)  | \$3,353 (1,661 – 8,454) |

Abbreviations: SD, standard deviation; IQR, interquartile range
